# Supplementary material for: Hollow Ru/RuO2 nanospheres with nanoparticulate shells for high performance electrocatalytic oxygen evolution reactions
Source: Royal Society of Chemistry journal article supplement (doi:10.1039/d3na00899a), 2023-12-15
Supplement: d3na00899a1.pdf [file d3na00899a1.pdf]

*Electronic Supplementary Information for*

**Hollow Ru/RuO<sub>2</sub> nanospheres with nanoparticulate shells  
for high performance electrocatalytic oxygen evolution reactions**

Kyoungil Cho,<sup>‡a</sup> June Young Jang,<sup>‡a</sup> Yoon-Joo Ko,<sup>b</sup> Yoon Myung,<sup>\*c</sup> and Seung Uk Son<sup>\*a</sup>

<sup>a</sup>Department of Chemistry, Sungkyunkwan University, Suwon 16419, Korea

E-mail: [sson@skku.edu](mailto:sson@skku.edu)

<sup>b</sup>Laboratory of Nuclear Magnetic Resonance, The National Center for Inter-University Research Facilities (NCIRF),  
Seoul National University, Seoul 08826, Korea

<sup>c</sup>Korea Institute of Industrial Technology, Advanced Energy Materials and Components R&D Group, Busan 46744, Korea

E-mail: [myungyoon@kitech.re.kr](mailto:myungyoon@kitech.re.kr)

**Fig. S1** Low magnification SEM images of H-MOP-Ru and HN-Ru/RuO<sub>2</sub>.

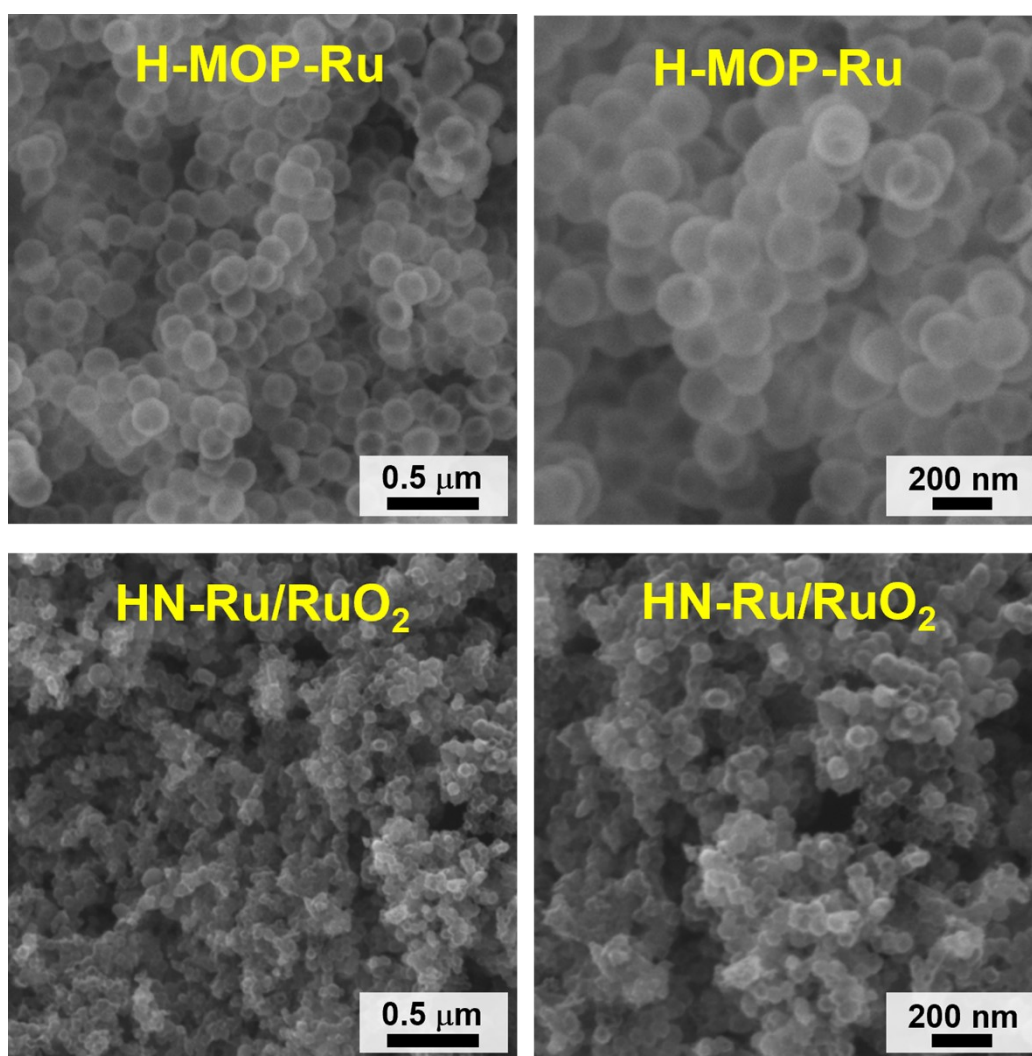

Fig. S2 Powder XRD patterns of H-MOP-CatP, H-MOP-Cat, and H-MOP-Ru.

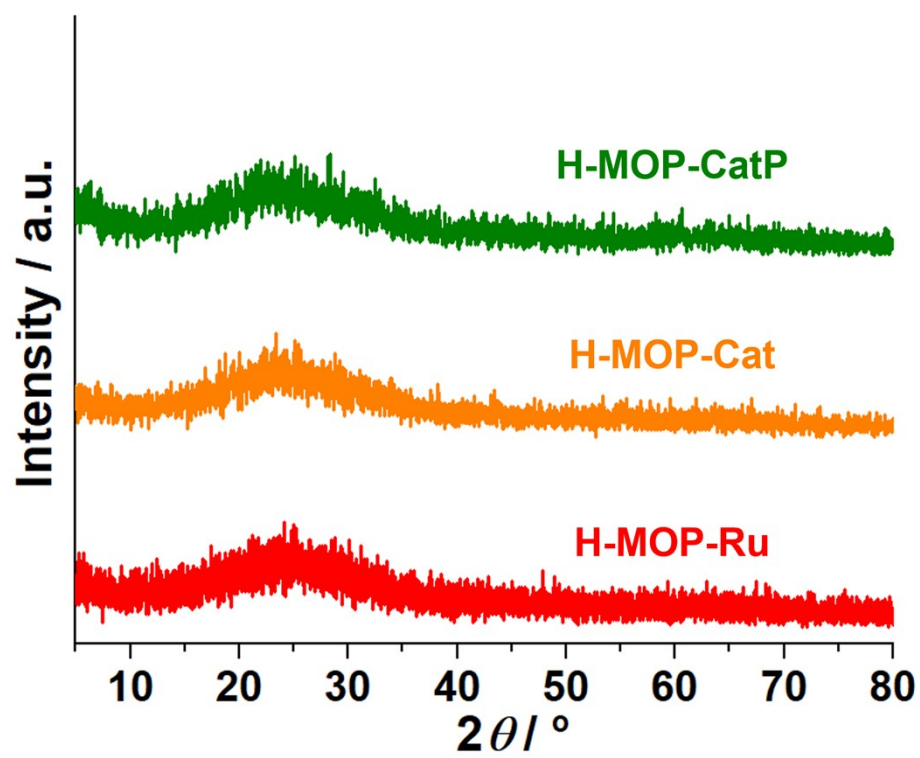

Fig. S3 TGA curves of H-MOP-CatP, H-MOP-Cat, and H-MOP-Ru.

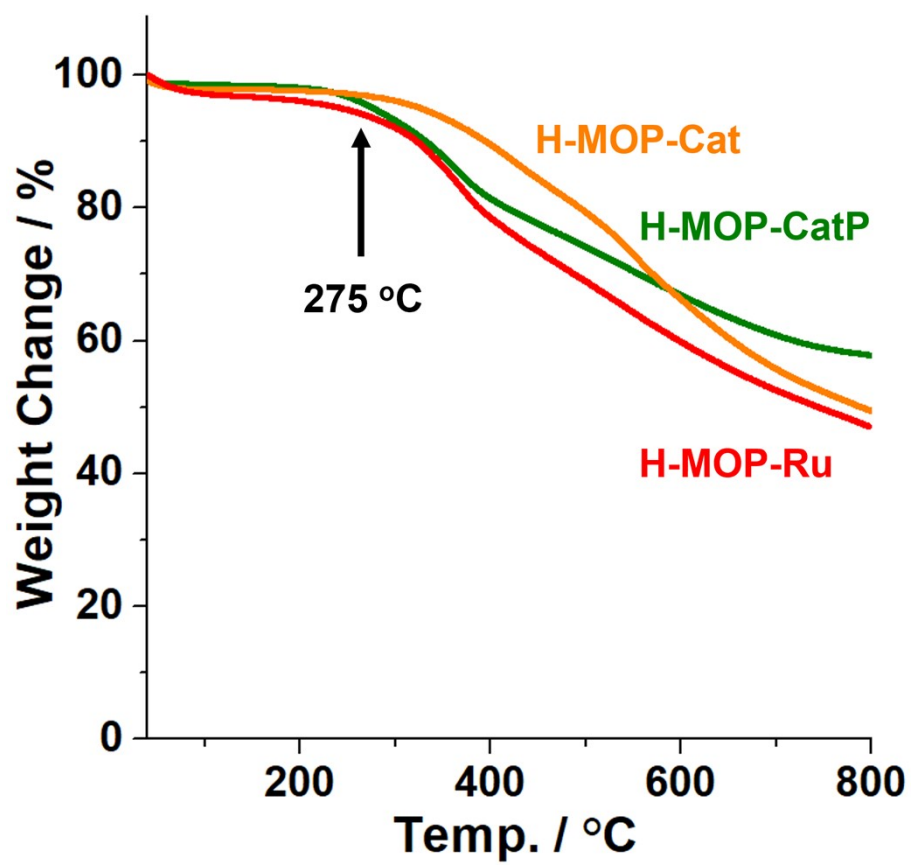

Fig. S4 XPS spectra of Ru 3p orbitals, O 1s orbitals, and Pd 3d orbitals of HN-Ru/RuO<sub>2</sub>, A-Ru/RuO<sub>2</sub>, N-Ru/RuO<sub>2</sub>, and N1-Ru/RuO<sub>2</sub>.

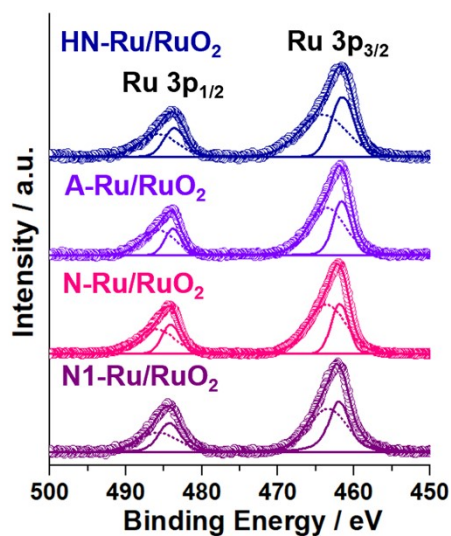

|                        |               |        |        |        |        |
|------------------------|---------------|--------|--------|--------|--------|
| HN-Ru/RuO <sub>2</sub> | Peak          | p1     | p2     | p3     | p4     |
|                        | Position (eV) | 461.48 | 464.08 | 483.58 | 485.75 |
|                        | FWHM          | 3.57   | 7.39   | 3.30   | 5.93   |
|                        | Area (%)      | 28.2   | 41.5   | 12.4   | 17.9   |
| $r^2$                  |               | 0.996  |        |        |        |
| A-Ru/RuO <sub>2</sub>  | Peak          | p1     | p2     | p3     | p4     |
|                        | Position (eV) | 461.60 | 463.57 | 483.78 | 485.72 |
|                        | FWHM          | 2.79   | 5.77   | 2.56   | 5.21   |
|                        | Area (%)      | 24.6   | 44.7   | 10.5   | 20.2   |
| $r^2$                  |               | 0.997  |        |        |        |
| N-Ru/RuO <sub>2</sub>  | Peak          | p1     | p2     | p3     | p4     |
|                        | Position (eV) | 461.84 | 463.58 | 484.06 | 486.00 |
|                        | FWHM          | 2.72   | 5.97   | 2.80   | 5.78   |
|                        | Area (%)      | 20.4   | 45.2   | 12.3   | 22.1   |
| $r^2$                  |               | 0.999  |        |        |        |
| N1-Ru/RuO <sub>2</sub> | Peak          | p1     | p2     | p3     | p4     |
|                        | Position (eV) | 461.95 | 463.41 | 484.23 | 485.72 |
|                        | FWHM          | 3.23   | 6.04   | 3.46   | 6.21   |
|                        | Area (%)      | 29.1   | 37.7   | 16.1   | 17.1   |
| $r^2$                  |               | 0.997  |        |        |        |

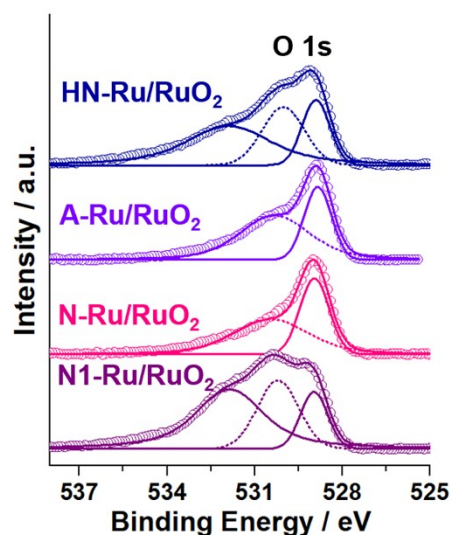

|                        |               |        |        |        |
|------------------------|---------------|--------|--------|--------|
| HN-Ru/RuO <sub>2</sub> | Peak          | p1     | p2     | p3     |
|                        | Position (eV) | 528.91 | 530.02 | 531.90 |
|                        | FWHM          | 1.11   | 1.71   | 3.47   |
|                        | Area (%)      | 21.7   | 29.8   | 48.5   |
| $r^2$                  |               | 0.997  |        |        |
| A-Ru/RuO <sub>2</sub>  | Peak          | p1     | p2     | -      |
|                        | Position (eV) | 528.84 | 530.32 | -      |
|                        | FWHM          | 1.10   | 2.82   | -      |
|                        | Area (%)      | 36.5   | 63.5   | -      |
| $r^2$                  |               | 0.993  |        |        |
| N-Ru/RuO <sub>2</sub>  | Peak          | p1     | p2     | -      |
|                        | Position (eV) | 528.96 | 530.44 | -      |
|                        | FWHM          | 1.17   | 3.06   | -      |
|                        | Area (%)      | 42.8   | 57.2   | -      |
| $r^2$                  |               | 0.991  |        |        |
| N1-Ru/RuO <sub>2</sub> | Peak          | p1     | p2     | p3     |
|                        | Position (eV) | 528.97 | 530.20 | 531.86 |
|                        | FWHM          | 1.09   | 1.67   | 2.77   |
|                        | Area (%)      | 16.5   | 30.1   | 53.4   |
| $r^2$                  |               | 0.997  |        |        |

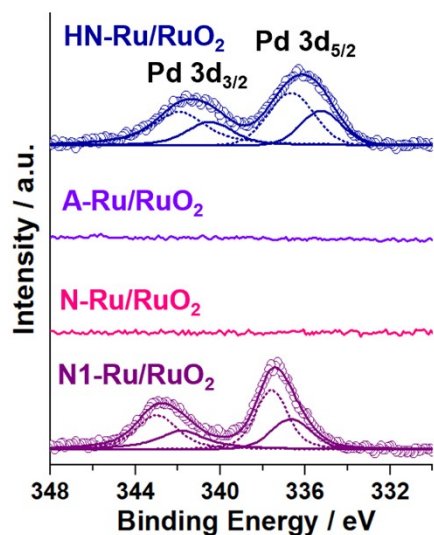

|                        |               |        |        |        |        |
|------------------------|---------------|--------|--------|--------|--------|
| HN-Ru/RuO <sub>2</sub> | Peak          | p1     | p2     | p3     | p4     |
|                        | Position (eV) | 335.24 | 336.66 | 340.48 | 341.94 |
|                        | FWHM          | 2.28   | 2.55   | 2.58   | 2.99   |
|                        | Area (%)      | 20.2   | 34.5   | 17.8   | 27.5   |
| $r^2$                  |               | 0.992  |        |        |        |
| N1-Ru/RuO <sub>2</sub> | Peak          | p1     | p2     | p3     | p4     |
|                        | Position (eV) | 336.66 | 337.58 | 341.80 | 342.99 |
|                        | FWHM          | 2.23   | 1.81   | 2.63   | 2.30   |
|                        | Area (%)      | 19.2   | 33.3   | 18.0   | 29.5   |
| $r^2$                  |               | 0.991  |        |        |        |

Fig. S5 Scan rate-dependent cyclic voltammograms of HN-Ru/RuO<sub>2</sub>, A-Ru/RuO<sub>2</sub>, N-Ru/RuO<sub>2</sub>, and N1-Ru/RuO<sub>2</sub>.

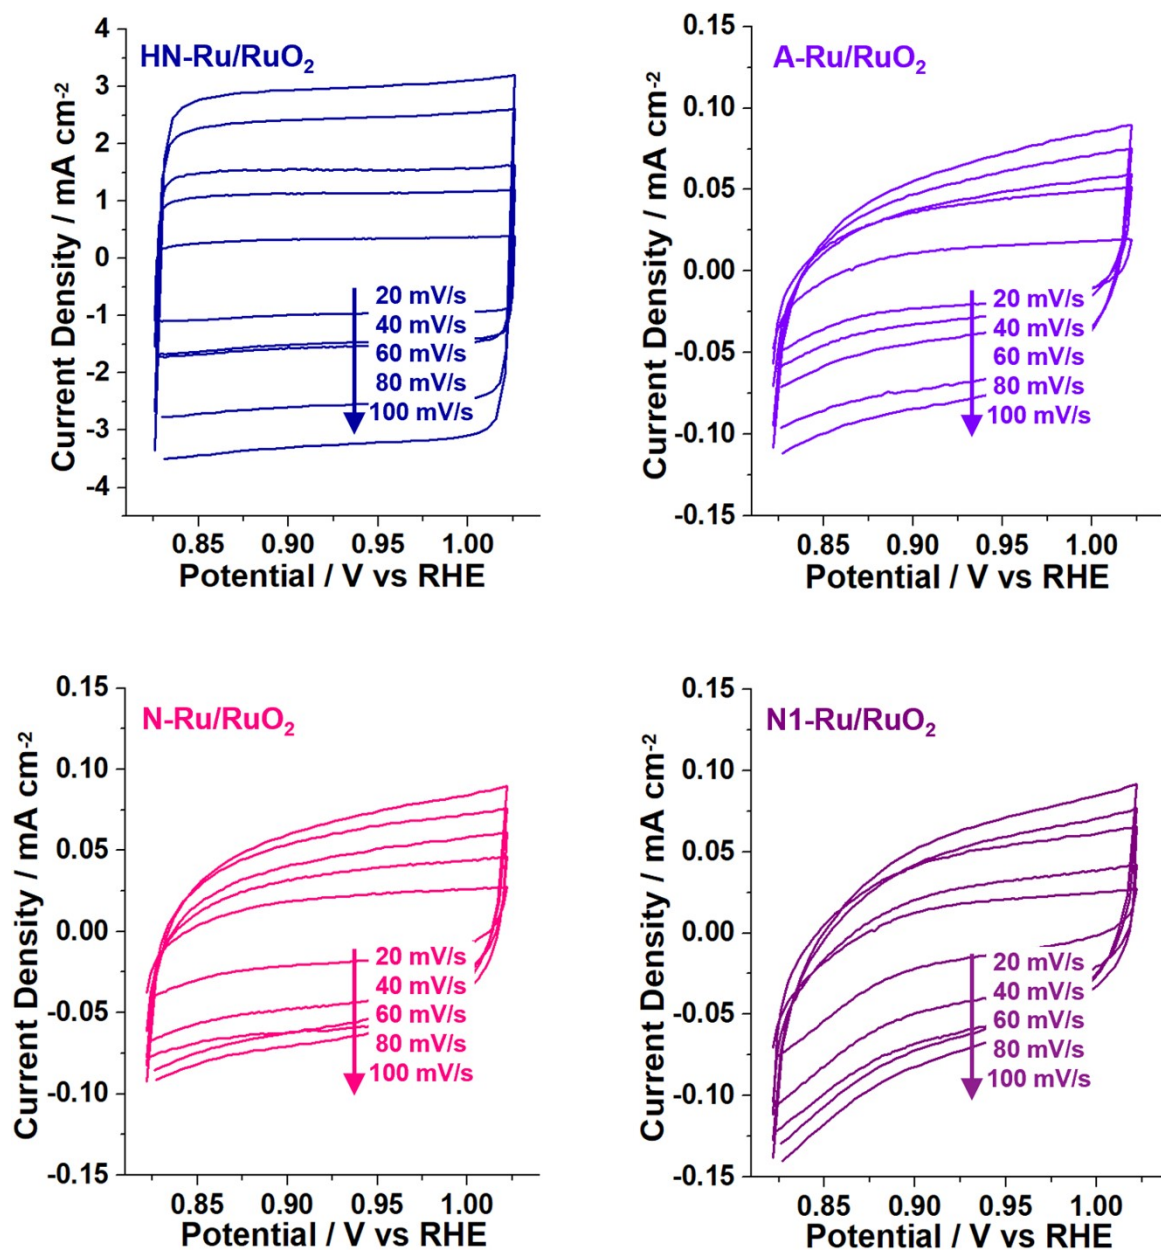

**Fig. S6** Nyquist plots of HN-Ru/RuO<sub>2</sub>, A-Ru/RuO<sub>2</sub>, N-Ru/RuO<sub>2</sub>, and N1-Ru/RuO<sub>2</sub> (Electrochemical impedance spectroscopy was conducted at the onset potential of 1.4 V vs RHE within a frequency range of 0.1~100 kHz with a signal amplitude of 10 mV).

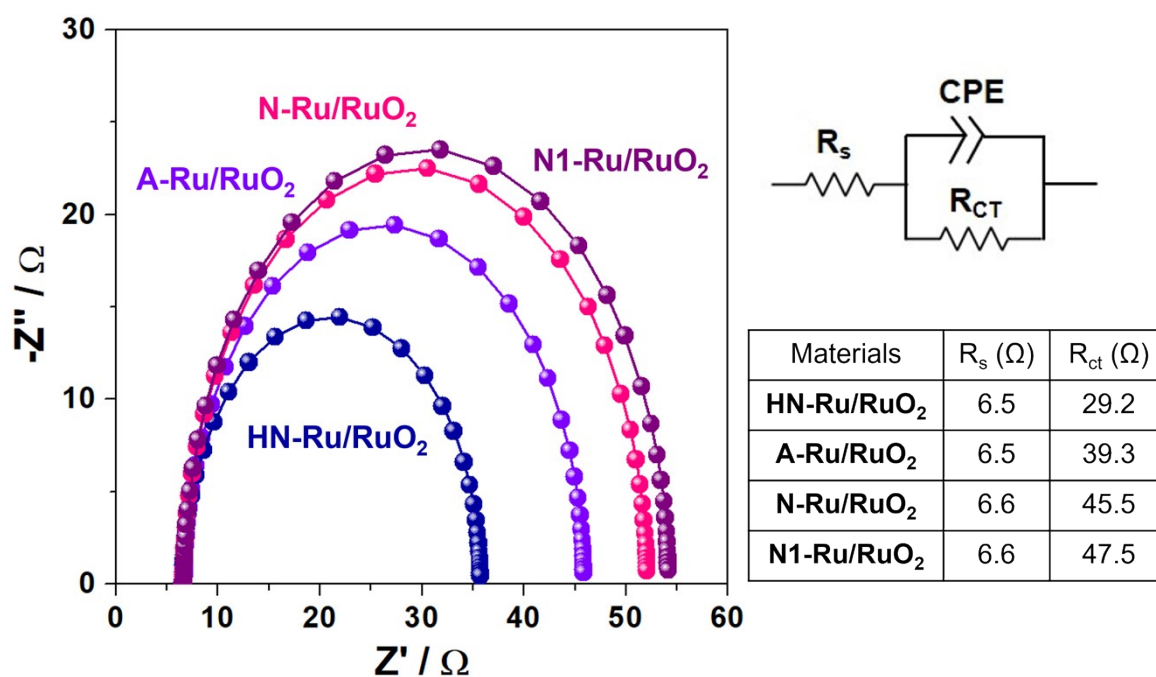



Fig. S7 (a) TEM and (b) XPS analysis of HN-Ru/RuO<sub>2</sub> retrieved after durability tests.

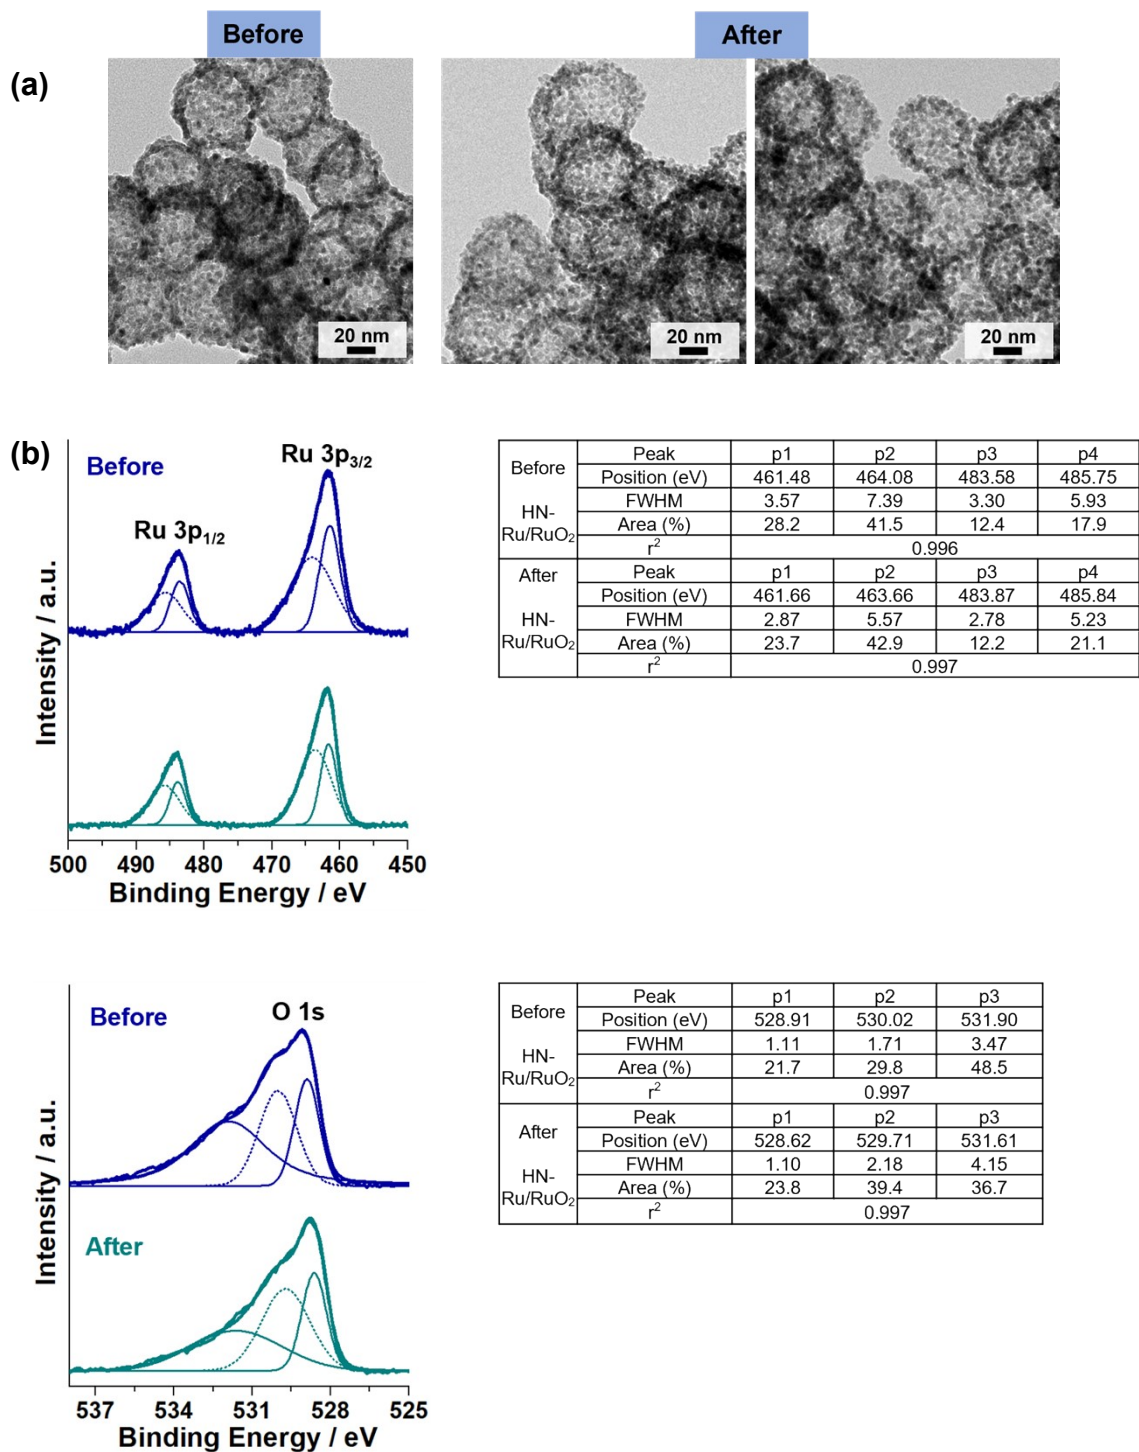

**Fig. S8** HER performance of HN-Ru/RuO<sub>2</sub> and N-Ru/RuO<sub>2</sub> (Ar-saturated 1.0 M KOH, working electrode: graphite, reference electrode: Ag/AgCl): (a) HER polarization curves and overpotentials at 10 mA/cm<sup>2</sup> (scan rate: 10 mV/s) and (b) Tafel plots.

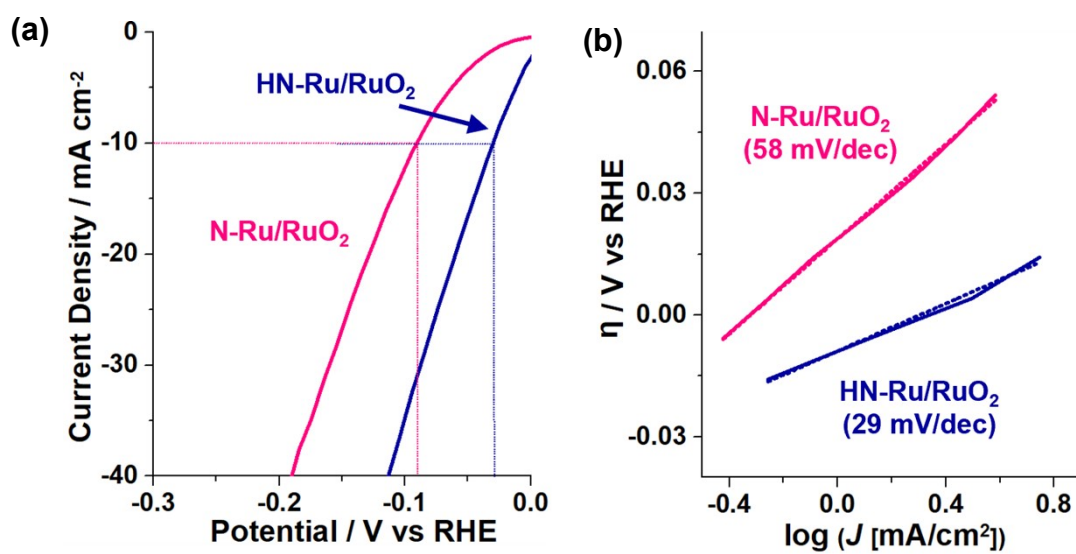



**Table S1** Physical parameters of H-MOP-CatP, H-MOP-Cat, H-MOP-Ru, HN-Ru/RuO<sub>2</sub>, A-Ru/RuO<sub>2</sub>, N-Ru/RuO<sub>2</sub>, and N1-Ru/RuO<sub>2</sub>.

| Materials              | S <sub>ABET</sub> <sup>a</sup><br>(m <sup>2</sup> /g) | V <sub>mic</sub> <sup>b</sup><br>(cm <sup>3</sup> /g) | V <sub>t</sub> <sup>c</sup><br>(cm <sup>3</sup> /g) |
|------------------------|-------------------------------------------------------|-------------------------------------------------------|-----------------------------------------------------|
| H-MOP-CatP             | 339                                                   | 0.088                                                 | 0.30                                                |
| H-MOP-Cat              | 569                                                   | 0.14                                                  | 0.38                                                |
| H-MOP-Ru               | 361                                                   | 0.087                                                 | 0.24                                                |
| HN-Ru/RuO <sub>2</sub> | 80                                                    | -                                                     | 0.18                                                |
| A-Ru/RuO <sub>2</sub>  | 10                                                    | -                                                     | 0.019                                               |
| N-Ru/RuO <sub>2</sub>  | 6                                                     | -                                                     | 0.010                                               |
| N1-Ru/RuO <sub>2</sub> | 11                                                    | -                                                     | 0.031                                               |

<sup>a</sup> Surface area obtained by a BET plot. <sup>b</sup> Micropore volume obtained by a t-plot. <sup>c</sup> Total pore volume.

**Table S2** Electrocatalytic performance of RuO<sub>2</sub>-based materials for OER in alkaline electrolytes.

| Entry | Materials                                        | Strategy               | Overpotential<br>@10 mA/cm <sup>2</sup> (mV) | Tafel slope<br>(mV/dec) | Electrolyte | Year      | Ref |
|-------|--------------------------------------------------|------------------------|----------------------------------------------|-------------------------|-------------|-----------|-----|
| 1     | RuO <sub>2</sub> /NCNTs                          | Carbon composites      | 350                                          | 65                      | 0.1 M KOH   | 2016      | 1   |
| 2     | RuO <sub>2</sub> /C nanoparticles                | Carbon composites      | -                                            | 69                      | 0.1 M KOH   | 2017      | 2   |
| 3     | RuO <sub>2</sub> /N-C                            | Carbon composites      | 280                                          | 56                      | 1 M KOH     | 2018      | 3   |
| 4     | Ru/RuO <sub>2</sub> nanorods                     | Nanoengineering        | 320                                          | 86                      | 0.1 M KOH   | 2019      | 4   |
| 5     | RuO <sub>2</sub> /C                              | Carbon composites      | 300                                          | 116                     | 0.1 M KOH   | 2019      | 5   |
| 6     | Ru/RuO <sub>2</sub> /CNT                         | Carbon composites      | 209                                          | 64                      | 1 M KOH     | 2020      | 6   |
| 7     | RuO <sub>2</sub> /CeO <sub>2</sub> nanoparticles | Metal oxide composites | 350                                          | 74                      | 1 M KOH     | 2020      | 7   |
| 8     | RuO <sub>2</sub> /F-doped graphene               | Carbon composites      | 239                                          | 56                      | 1 M KOH     | 2020      | 8   |
| 9     | Ru/RuO <sub>2</sub> /N-rGO                       | Carbon composites      | 255                                          | 89.4                    | 1 M KOH     | 2020      | 9   |
| 10    | CoO <sub>x</sub> -RuO <sub>2</sub> /NF           | Carbon composites      | 420                                          | 69.6                    | 1 M KOH     | 2020      | 10  |
| 11    | RuO <sub>2</sub> /Co <sub>3</sub> O <sub>4</sub> | Metal oxide composites | 302                                          | 74.37                   | 0.1 M KOH   | 2020      | 11  |
| 12    | RuO <sub>2</sub> nanoplates                      | Nanoengineering        | 400                                          | 82.5                    | 1 M KOH     | 2022      | 12  |
| 13    | HN-Ru/RuO <sub>2</sub>                           | Nanoengineering        | 295                                          | 46                      | 1 M KOH     | This work |     |

1. K. Xie, W. Xia, J. Masa, F. Yang, P. Weide, W. Schuhmann and M. Muhler, *J. Energy Chem.* 2016, **25**, 282-288.
2. H. -S. Park, E. Seo, J. Yang, Y. Lee, B. -S. Kim and H. -K. Song, *Sci. Rep.* 2017, **7**, 7150.
3. C. -Z. Yuan, Y. -F. Jiang, Z. -W. Zhao, S. -J. Zhao, X. Zhou, T. -Y. Cheang and A. -W. Xu, *ACS Sustainable Chem. Eng.* 2018, **6**, 11529-11535.
4. R. Jiang, D. T. Tran, J. Li and D. Chu, *Energy Environ. Mater.* 2019, **2**, 201-208.
5. H. -S. Park, J. Yang, M. K. Cho, Y. Lee, S. Cho, S. -D. Yim, B. -S. Kim, J. H. Jang and H. -K. Song, *Nano Energy* 2019, **55**, 49-58.
6. M. Zhang, J. Chen, H. Li, P. Cai, Y. Li and Z. Wen, *Nano Energy* 2019, **61**, 576-583.
7. S. M. Galani, A. Mondal, D. N. Srivastava and A. B. Panda, *Int. J. Hydrog. Energy* 2020, **45**, 18635-18644.
8. Z. Fan, F. Liao, H. Shi, Y. Liu, M. Shao and Z. Kang, *Inorg. Chem. Front.* 2020, **7**, 2188-2194.
9. X. Gao, J. Chen, X. Sun, B. Wu, B. Li, Z. Ning, J. Li and N. Wang, *ACS Appl. Nano Mater.* 2020, **3**, 12269-12277.
10. T. Yu, G. Xu, G. Qian, J. Chen, H. Zhang, L. Luo and S. Yin, *ACS Sustainable Chem. Eng.* 2020, **8**, 17520-17526.
11. B. -Y. Guo, X. -Y. Zhang, X. Ma, T. -S. Chen, Y. Chen, M. -L. Wen, J. -F. Qin, J. Nan, Y. -M. Chai and B. Dong, *Int. J. Hydrog. Energy* 2020, **45**, 9575-9582.
12. S. Sarkar, D. Mukherjee, R. Harini and G. Nagaraju, *J. Mater. Sci.* 2022, **57**, 7680-7693.
